# Supplementary material for: Coupled and decoupled legumes and cereals in prehistoric northern and southern China
Source: Front Plant Sci. 2022 Oct 7;13:1013480. doi: 10.3389/fpls.2022.1013480 (PMC9585268; doi:10.3389/fpls.2022.1013480)
Supplement: Supplementary file 1 [file Table_1.xlsx]

## Sheet: Soybean
Table S1. Detailed information of archaeological sites with soybean excavated in China
No.	Province	City/county	Site	Culture	Age (cal BP)	Period	Longitude	Latitude	Cultivated soybean	Wild soybean	Reference	Original reference
1	Henan	Dengzhou	Baligang	Jiahu I	8700–8100	Peiligang period	112.13	32.68	0	2	Deng ZH, 2015	邓振华，2015
2	Henan	Wuyang	Jiahu2001	Jiahu I	9000–8600	Peiligang period	113.667	33.6	0	548	Zhao ZJ et al. 2009	赵志军等，2009
3	Henan	Wuyang	Jiahu2001	Jiahu II	8600–8200	Peiligang period	113.667	33.6	0	32	Zhao ZJ et al. 2009	赵志军等，2009
4	Henan	Wuyang	Jiahu2001	Jiahu III	8200–7800	Peiligang period	113.667	33.6	0	1	Zhao ZJ et al. 2009	赵志军等，2009
5	Henan	Wuyang	Jiahu2013	Jiahu I&II	8500–8000	Peiligang period	113.667	33.6	0	131	Zhang, JZ et al. 2018	张居中等，2018
6	Henan	Mianchi	Bancun	Peiligang		Peiligang period	111.83	35.07	0	unknown	Kong ZC et al. 1999	孔昭宸等，1999
7	Shandong	Jinan	Yuezhuang	Houli	8060–7750	Peiligang period	116.7	36.4667	0	1	Crawford et al. 2013	Gary W.Crawford 2013
8	Hunan	Lixian	Bashidang	Pengtoushan	9000–7800	Peiligang period	111.85	29.75	0	27	Hunan Provincial Institute of Cultural Relics and Archaeology. 2006	湖南省文物考古研究所，2006
9	Inner Mongolia	Aohan	Xinglonggou I	Xinglongwa	8000–7500	Peiligang period	120.67	42.37	0	8	Sun YG. 2014	孙永刚，2014
10	Shaanxi	Xi'an	Yuhuazhai	early Yangshao-Beishouling		Early Yangshao period	108.869	34.2392	0	29	Zhao ZJ. 2017	赵志军，2017
11	Shaanxi	Xi'an	Yuhuazhai	early Yangshao-Banpo		Early Yangshao period	108.869	34.2392	0	83	Zhao ZJ. 2017	赵志军，2017
12	Shaanxi	Xi'an	Yuhuazhai	early Yangshao-Shijia		Early Yangshao period	108.869	34.2392	0	20	Zhao ZJ. 2017	赵志军，2017
13	Shaanxi	Huaxian	Dongyang	Yangshao (Banpo-Miaodigou)		Early Yangshao period	110.064	34.6262	4	20	Zhao ZJ. 2019	赵志军，2019
14	Shandong	Heze	Helou	early Dawenkou	6200–5600	Early Yangshao period	115.546	35.1305	3	0	Zhong H. 2021	钟华，2021
15	Shandong	Tengzhou	Guanqiaocunnan	middle Beixin	6340–5970	Early Yangshao period	117.22	34.9281	0	82	Jin et al. 2020 Antiquity	Jin et al. 2020 Antiquity
16	Shaanxi	Xi'an	Yuhuazhai	late Yangshao		Late Yangshao period	108.869	34.2392	0	6	Zhao ZJ. 2017	赵志军，2017
17	Shaanxi	Huayin	Xinglefang	middle Maiodigou	5500	Late Yangshao period	109.97	34.53	0	6	Liu H et al. 2013	刘焕等，2013
18	Shaanxi	Fufeng	Anban	Anban I (middle Yangshao)	5695±34	Late Yangshao period	107.92	34.35	1	1	Liu XY, 2014	刘晓媛，2014
19	Shaanxi	Fufeng	Anban	Anban II (late Yangshao)	5500–5000	Late Yangshao period	107.92	34.35	9	1	Liu XY, 2014	刘晓媛，2014
20	Shaanxi	Lantian	Xinjie	late Yangshao	6000–5000	Late Yangshao period	109.15	34.25	10	49	Zhong H et al. 2015	钟华等，2015
21	Shaanxi	Gaoling	Yangguanzhia	Miaodigou		Late Yangshao period	109.024	34.4729	0	13	Zhong H et al. 2020	钟华等，2020
22	Shanxi	Jiangxian	Liuquan I	Yangshao	7000–5000	Late Yangshao period	111.431	35.4715	3	0	Song JX et al. 2017 AAS	Song et al. 2017
23	Shanxi	Wenxi	Cangdi	Yangshao	7000–5000	Late Yangshao period	111.38	35.4771	3	0	Song JX et al. 2017 AAS	Song et al.2017
24	Shanxi	Wenxi	Dingdian	Yangshao	7000–5000	Late Yangshao period	111.271	35.3987	1	0	Song JX et al. 2017 AAS	Song et al.2017
25	Shanxi	Wenxi	Shangshaowang	Yangshao	7000–5000	Late Yangshao period	111.261	35.3686	62	0	Song JX et al. 2017 AAS	Song et al.2017
26	Shanxi	Wenxi	Diantoubao	Yangshao	7000–5000	Late Yangshao period	111.329	35.3431	55	0	Song JX et al. 2017 AAS	Song et al.2017
27	Henan	Lingbao	Xipo	Miaodigou		Late Yangshao period	110.698	34.4944	25	0	Zhong H et al. 2020	钟华等，2020
28	Henan	Hebi	Liuzhuang	late Yangshao-Dasikong	5100–4700	Late Yangshao period	114.25	35.75	0	13	Wang CM et al. 2010	王传明等，2010
29	Henan	Xichuan	Jinying	late Yangshao	5400–3900	Late Yangshao period	111.283	33.0167	0	4	Deng ZH, 2015	邓振华，2015
30	Henan	Lingbao	Xipo	late Yangshao	4900–4500	Late Yangshao period	110.83	34.35	0	1	Zhao ZJ. 2011	赵志军，2011《科技考古（三）》
31	Henan	Zhengzhou	Dahecun	late Yangshao	5012–4924	Late Yangshao period	113.694	34.844	0	4	Wang et al. 2018 Holocene	Wang et al.2018 The Holocene
32	Henan	Dengfeng	Yangcun	Yangshao	7000–5000	Late Yangshao period	113.015	34.4084	5	0	Fuller DQ et al. 2007	Dorian Q Fuller等，2007
33	Henan	Dengfeng	Yuanqiao	Yangshao	7000–5000	Late Yangshao period	113.002	34.3864	1057	0	Fuller DQ et al. 2007	Dorian Q Fuller等，2007
34	Henan	Dengfeng	Yuanqiao+	Yangshao	7000–5000	Late Yangshao period	113.032	34.3893	4	0	Fuller DQ et al. 2007	Dorian Q Fuller等，2007
35	Henan	Dengfeng	Shiyangguan	late Yangshao	6000–5000	Late Yangshao period	113.202	34.3704	1	0	Fuller DQ et al. 2007	Dorian Q Fuller等，2007
36	Henan		Weizhuangxi	late Yangshao	4330±70 ？	Late Yangshao period	112.98	34.6751	0	2	Lee GA et al. 2007 PNAS	Lee et al. 2007
37	Henan		Zhaocheng	late Yangshao	5600–4900	Late Yangshao period	112.887	34.5559	0	1	Lee GA et al. 2007 PNAS	Lee et al. 2007
38	Henan	Wuyang	Hunanguo	Yangshao	5700–5010	Late Yangshao period	113.73	33.67	0	4	Cheng ZJ. 2016	程志杰，2016（博士）
39	Henan	Wuyang	Agangsi	Yangshao	5370–4920	Late Yangshao period	113.613	33.6006	0	26	Cheng ZJ. 2016	程志杰，2016（博士）
40	Henan	Zhengzhou	Wanggou	late Yangshao		Late Yangshao period	113.411	34.8253	148	23	Yang F et al. 2020	杨凡等，2020
41	Shandong	Qingdao	Beiqian07/11/13	early Dawenkou		Late Yangshao period	120.736	36.6022	0	38	Wu JR. 2018	吴瑞静，2018
42	Shandong	Taian	Dawenkou	early Dawenkou		Late Yangshao period	117.093	35.9419	0	8	Wu JR. 2018	吴瑞静，2018
43	Shandong	Jinan	Jiaojia	middle-late Dawenkou		Late Yangshao period	117.343	36.7806	0	1116	Wu JR. 2018	吴瑞静，2018
44	Shandong	Yantai	Wutai	late Dawenkou-early Longshan		Late Yangshao period	121.428	37.446	0	3	Chen ST et al. 2019	陈松涛等，2019
45	Hubei	Yunxian	Dasi	Yangshao		Late Yangshao period	110.757	32.8524	0	2	Tang LY et al. 2016	唐丽雅等，2016
46	Hubei	Yunxian	Dasi	Qujialing		Late Yangshao period	110.757	32.8524	0	1	Tang LY et al. 2016	唐丽雅等，2016
47	Hubei	Yunxian	Qinglongquan	early Qujialing	5000	Late Yangshao period	110.85	32.8333	0	22	Wu CR. 2011	吴传仁，2011
48	Hubei	Yunxian	Qinglongquan	early-middle Yangshao	6300–5400	Late Yangshao period	110.85	32.8333	23	5	Deng ZH, 2015	邓振华，2015
49	Hubei	Yunxian	Qinglongquan	Qujialing	5400–4600	Late Yangshao period	110.85	32.8333	20	22	Deng ZH, 2015	邓振华，2015
50	Hubei	Yunxian	Guojiadaozi	late Yangshao	5400–4900	Late Yangshao period	110.967	32.8333	0	1	Deng ZH, 2015	邓振华，2015
51	Liaoning	Lvshun	Wangjiacun	Xiaozhushan III	6300–4500	Late Yangshao period	121.52	38.87	0	10	Ma YC et al. 2015	马永超等，2015《北方》
52	Liaoning	Changhai	Wujiacun	Xiaozhushan III	5500	Late Yangshao period	122.363	39.1833	38	0	Ma XJ et al. 2015	马晓娇等，2015《东方考古（11）》
53	Gansu	Wuwei	Mozuizi	Machang	4283–4033	Longshan period	102.649	37.7861	26	0	Zhou XY et al. 2016 QI	Zhou Xinying et al. 2016 QI
54	Gansu	Minxian	Shannashuzha	early Majiayao	5300–4700	Longshan period	104.1	34.4833	0	2	Hu ZY. 2015	胡中亚，2015
55	Shaanxi	Zhouyuan	Wangjiazui	Longshan	4600–4000	Longshan period	107.6	34.48	122	0	Zhao ZJ. 2004	周原考古队，2004
56	Shaanxi	Fufeng	Anban	Anban III (early Longshan)	4923±42	Longshan period	107.92	34.35	5	5	Liu XY, 2014	刘晓媛，2014
57	Shaanxi	Lantian	Xinjie	early Longshan	5000–4600	Longshan period	109.15	34.25	2	6	Zhong H et al. 2015	钟华等，2015
58	Shaanxi	Hanzhong	Longgangsi	Yangshao-Longshan	4973–4826	Longshan period	106.977	33.0723	62	3	Tang LY et al. 2020	唐丽雅等，2020
59	Shaanxi	Shenmu	Muzhuzhuliang	Dakou (late Longshan)		Longshan period	109.923	38.6377	0	1	Guo XN, 2017	郭小宁，2017
60	Shaanxi	Hengshan	Miaopan	Longshan	4300–4100	Longshan period	109.294	37.9213	4	0	Sheng et al. 2018 Holocene	Sheng et al. 2018 Holocene
61	Shaanxi	Shenmu	Xinhua	Xinhua	4890–4278	Longshan period	110.033	38.6333	0	5	Bao YG et al. 2019 PLoS ONE	Bao et al. 2019 PLoS ONE
62	Shaanxi	Shenmu	Shimao	Shimao	4036–3519	Longshan period	110.467	39.0667	0	11	Bao YG et al. 2019 PLoS ONE	Bao et al. 2022 PLoS ONE
63	Inner Mongolia	Yijinhuoluo	Zhukaigou	Zhukaigou	4147–3700	Longshan period	110.433	39.65	0	29	Bao YG et al. 2019 PLoS ONE	Bao et al. 2033 PLoS ONE
64	Hebei	Zhangjiakou	Dashuigou	Longshan		Longshan period	114.951	40.8722	7	1	Wu RJ et al. 2017	吴瑞静等，2017
65	Shanxi	Xiangfen	Taosi	Longshan-Taosi	4500–3900	Longshan period	111.5	35.87	0	3	Zhao ZJ et al. 2006	张志军等，2006
66	Shanxi	Jiangxian	Zhoujiazhuang	Miaodigou II	4900–4300	Longshan period	111.484	35.4921	14	0	Song JX et al. 2017 AAS	Song et al.2017
67	Shanxi	Wenxi	Dingdian	Miaodigou II	4900–4300	Longshan period	111.271	35.3987	4	0	Song JX et al. 2017 AAS	Song et al.2017
68	Shanxi	Wenxi	Suncun I	Miaodigou II	4900–4300	Longshan period	111.312	35.3615	8	0	Song JX et al. 2017 AAS	Song et al.2017
69	Shanxi	Wenxi	Suncun V	Miaodigou II	4900–4300	Longshan period	111.312	35.3615	1	0	Song JX et al. 2017 AAS	Song et al.2017
70	Shanxi	Wenxi	Diantoubao	Miaodigou II	4900–4300	Longshan period	111.329	35.3431	41	0	Song JX et al. 2017 AAS	Song et al.2017
71	Shanxi	Wenxi	Hougong II	Miaodigou II	4900–4300	Longshan period	111.412	35.3644	82	0	Song JX et al. 2017 AAS	Song et al.2017
72	Shanxi	Jiangxian	Xijing	Longshan	4600–3800	Longshan period	111.529	35.5113	16	0	Song JX et al. 2017 AAS	Song et al.2017
73	Shanxi	Jiangxian	Zhoujiazhuang	Longshan	4600–3800	Longshan period	111.484	35.4921	4	0	Song JX et al. 2017 AAS	Song et al.2017
74	Shanxi	Jiangxian	Jiajiabao	Longshan	4600–3800	Longshan period	111.469	35.5051	7	0	Song JX et al. 2017 AAS	Song et al.2017
75	Shanxi	Wenxi	Shangyukou	Longshan	4600–3800	Longshan period	111.403	35.4316	9	0	Song JX et al. 2017 AAS	Song et al.2017
76	Shanxi	Wenxi	Hucun	Longshan	4600–3800	Longshan period	111.368	35.4963	7	0	Song JX et al. 2017 AAS	Song et al.2017
77	Shanxi	Wenxi	Zhangjiazhuang	Longshan	4600–3800	Longshan period	111.551	35.3029	22	0	Song JX et al. 2017 AAS	Song et al.2017
78	Shanxi	Wenxi	Chengjiazhuang	Longshan	4600–3800	Longshan period	111.282	35.409	3	0	Song JX et al. 2017 AAS	Song et al.2017
79	Shanxi	Xiaxian	Shuinan	Longshan	4600–3800	Longshan period	111.158	35.2541	2	0	Song JX et al. 2017 AAS	Song et al.2017
80	Henan	Dengfeng	Wangchenggang	late Longshan	4500–4000	Longshan period	113.12	34.38	153	0	Zhao ZJ et al. 2007	赵志军等，2007
81	Henan	Dengfeng	Chengyao	Longshan		Longshan period	113.051	34.294	32	0	Zhong H et al. 2018	钟华等，2018
82	Henan	Boai	Xijincheng	Longshan	4600–4000	Longshan period	113.12	35.1	8	0	Chen XX et al. 2010	陈雪香等，2010
83	Henan	Dengzhou	Baligang	Shijiahe	4600–4200	Longshan period	112.13	32.68	0	2	Deng ZH, 2015	邓振华，2015
84	Henan	Dengzhou	Baligang	late Longshan	4300–4000	Longshan period	112.13	32.68	2	6	Deng ZH, 2015	邓振华，2015
85	Henan	Hebi	Dalaidian	Longshan		Longshan period	114.467	36.2333	44	0	Wu X et al. 2017	武欣等，2017
86	Henan	Xichuan	Xiazhai	late Longshan	4200–3900	Longshan period	111.267	33	0	2	Deng ZH, 2015	邓振华，2015
87	Henan	Xichuan	Jinying	late Longshan	4200–3900	Longshan period	111.283	33.0167	0	4	Deng ZH, 2015	邓振华，2015
88	Henan	Xichuan	Xiawangzhai	Qujialing	5200–4500	Longshan period	111.367	33.0167	0	1	Tang LY. 2014	唐丽雅，2014
89	Henan	Xichuan	Xiawangzhai	Longshan-Wangwan III	4500–3900	Longshan period	111.367	33.0167	14	59	Tang LY. 2014	唐丽雅，2014
90	Henan	Yuzhou	Wadian2007	Longshan	4600–4000	Longshan period	113.4	34.18	573	40	Liu C et al. 2010	刘昶等，2010
91	Henan	Yuzhou	Wadian2009	late Longshan		Longshan period	113.412	34.192	905	24	Liu C et al. 2018	刘昶等，2018
92	Henan	Lingbao	Quanjiu	Longshan	4500–4000	Longshan period	110.4	34.5167	0	2	Wei XT et al. 2015	魏兴涛等，2015《东方考古（11）》
93	Henan	Yuzhou	Wuwan	late Longshan	4600–4000	Longshan period	113.528	34.1308	85	0	Fuller DQ et al. 2007	Dorian Q Fuller等，2007
94	Henan	Dengfeng	Youfangtou	late Longshan	4600–4000	Longshan period	113.015	34.3779	13	0	Fuller DQ et al. 2007	Dorian Q Fuller等，2007
95	Henan	Yuzhou	Xiawu	late Longshan	4600–4000	Longshan period	113.39	34.2225	18	0	Fuller DQ et al. 2007	Dorian Q Fuller等，2007
96	Henan	Yuzhou	Wadian	late Longshan	4600–4000	Longshan period	113.41	34.1896	2	0	Fuller DQ et al. 2007	Dorian Q Fuller等，2007
97	Henan	Yuzhou	Jizhai	late Longshan	4600–4000	Longshan period	113.35	34.2187	6	0	Fuller DQ et al. 2007	Dorian Q Fuller等，2007
98	Henan	Dengfeng	Xifandian	late Longshan	4600–4000	Longshan period	113.093	34.4043	1	0	Fuller DQ et al. 2007	Dorian Q Fuller等，2007
99	Henan	Dengfeng	Shidao	late Longshan	4600–4000	Longshan period	112.882	34.362	6	0	Fuller DQ et al. 2007	Dorian Q Fuller等，2007
100	Henan	Yuzhou	Dugangsi	late Longshan	4600–4000	Longshan period	113.489	34.1154	31	0	Fuller DQ et al. 2007	Dorian Q Fuller等，2007
101	Henan		Sigoudongnan	early Longshan	4260±50	Longshan period	112.906	34.7097	1	2	Lee GA et al. 2007 PNAS	Lee et al. 2007
102	Henan		Matun	late Longshan	3590±60	Longshan period	112.841	34.6127	0	2	Lee GA et al. 2007 PNAS	Lee et al. 2007
103	Henan		Matunbei	Longshan		Longshan period	112.878	34.5757	16	0	Zhang JN et al. 2014	张俊娜等，2014
104	Henan		Zhaiwan	Longshan		Longshan period	112.722	34.5673	3	0	Zhang JN et al. 2014	张俊娜等，2014
105	Henan		Peicun	late Longshan		Longshan period	112.748	34.597	14	0	Zhang JN et al. 2014	张俊娜等，2014
106	Henan	Wuyang	Dabeisi	Longshan		Longshan period	113.696	33.48	0	1	Cheng ZJ. 2016	程志杰，2016（博士）
107	Henan	Wuyang	Shande	Longshan		Longshan period	113.726	33.6422	0	1	Cheng ZJ. 2016	程志杰，2016（博士）
108	Henan	Luohe	Lingyuntai	Longshan	4050–3900	Longshan period	113.867	33.6767	0	23	Cheng ZJ. 2016	程志杰，2016（博士）
109	Henan	Yancheng	Haojiatai	Longshan		Longshan period	114.037	33.5983	73	0	Deng ZH et al. 2017	邓振华等，2017
110	Henan	Huaiyang	Pingliangtai	Longshan		Longshan period	114.934	33.7135	25	0	Deng ZH et al. 2017	邓振华等，2017
111	Henan	Huaiyang	Pingliangtai	Longshan		Longshan period	114.924	33.7082	80	0	Zhao ZZ et al. 2019	赵珍珍等，2019
112	Henan	Luoyang	Wanggedang	late Longshan		Longshan period	112.466	34.632	580	13	Zhong H et al. 2019	钟华等，2019
113	Henan	Nanyang	Dalaidian	Longshan		Longshan period	114.467	36.2333	44	0	Wu X. 2016	武欣，2016
114	Anhui	Bengbu	Diaoyutai	late Longshan		Longshan period	117.333	32.9	0	11	Zhang J et al. 2018	张娟等，2018
115	Shandong	Zhangqiu	Ningjiabu	Longshan		Longshan period	117.445	36.8268	6	0	Wei N et al. 2018	魏娜等，2018
116	Shandong	Liaocheng	Hanwang	Longshan	4600–4000	Longshan period	116.217	36.5667	1	0	Jin GY et al. 2009	靳桂云等，2009《东方考古（6）》
117	Shandong	Liaocheng	Dawei	Longshan	4600–4000	Longshan period	116.25	36.4167	1	0	Jin GY et al. 2009	靳桂云等，2009《东方考古（6）》
118	Shandong	Liaocheng	Taizigao	Longshan	4600–4000	Longshan period	116.3	36.5833	0	10	Jin GY et al. 2009	靳桂云等，2009《东方考古（6）》
119	Shandong	Liaocheng	Shangzhuang	Longshan	4600–4000	Longshan period	116.217	36.5667	0	18	Jin GY et al. 2009	靳桂云等，2009《东方考古（6）》
120	Shandong	Liaocheng	Jiaochangpu	Longshan	4600–4000	Longshan period	116.233	36.4	0	1	Jin GY et al. 2009	靳桂云等，2009《东方考古（6）》
121	Shandong	Qingdao	Zhaojiazhuang	Longshan	4600–4300	Longshan period	120.02	36.23	0	11	Jin GY et al. 2011	靳桂云等，2011《科（三）》
122	Shandong	Zibo	Fangjia	Longshan-Chengziya	4600–4000	Longshan period	118	36.87	8	29	Jin GY et al. 2011b	靳桂云等，2011《海岱考古（4）》
123	Shandong	Linshu	Dongpan	Longshan	4600–4000	Longshan period	118.75	34.92	0	131	Wang HY et al. 2011	王海玉等，2011《东方考古（8）》
124	Shandong	Cangshan	Houyangguanzhuan	Longshan	4600–4000	Longshan period	118.2	34.883	0	2	Wang HY et al. 2019	王海玉等，2019《海岱考古（6）》
125	Shandong	Zouping	Dinggong	Longshan		Longshan period	117.853	36.9522	514	0	Wu WW et al. 2018	吴文婉等，2018
126	Shandong	Zhucheng	Xuejiazhuang	Longshan	4600–4000	Longshan period	119.23	35.93	2	0	Jin GY et al. 2009	靳桂云等，2009《东方考古（6）》
127	Shandong	Heze	Shilipubei	Longshan		Longshan period	115.639	35.0435	197	14	Guo RZ et al. 2019	郭荣臻等，2019
128	Shandong	Rizhao	Liangchengzhen	Longshan	4600–4000	Longshan period	119.57	35.57	0	30	Crawford et al. 2005	Crawford et al. 2005
129	Shandong	Tengzhou	Zhuanglixi	Longshan	4600–4000	Longshan period	117.07	35.05	0	unknown	Kong ZC et al. 1999	孔昭宸等，1999
130	Shandong	Linzi	Tonglin	Longshan	4600–4000	Longshan period	118.25	36.9	0	105	Song JX. 2007; Zhao ZJ. 2011	宋吉香，2007；赵志军，2011《科（三）》
131	Sichuan	Maoxian	Yingpanshan		5300–4600	Longshan period	103.85	31.6667	0	23	Zhao ZJ et al. 2011	赵志军等，2011
132	Yunnan	Binchuan	Baiyangcun		4650–4300	Longshan period	100.579	25.8364	3	0	Martello RD et al. 2018 JAS: reports	Martello et al.2018
133	Yunnan	Binchuan	Baiyangcun		4200–4050	Longshan period	100.579	25.8364	13	0	Martello RD et al. 2018 JAS: reports	Martello et al.2018
134	Hubei	Yunxian	Qinglongquan	late Qujialing	4800	Longshan period	110.85	32.8333	0	98	Wu CR. 2011	吴传仁，2011
135	Hubei	Yunxian	Qinglongquan	Qinglongquan III (Shijiahe)	4400	Longshan period	110.85	32.8333	0	26	Wu CR. 2011	吴传仁，2011
136	Hubei	Yunxian	Qinglongquan	Qinglongquan III (Shijiahe)	4400	Longshan period	110.85	32.8333	0	24	Wu CR. 2011	吴传仁，2011
137	Hubei	Yunxian	Qinglongquan	Shijiahe	4600–4200	Longshan period	110.85	32.8333	0	3	Deng ZH, 2015	邓振华，2015
138	Hubei	Tianmenshan	Tanjialing	Shijiahe	4700–4000	Longshan period	113.083	30.7667	90	0	Deng ZH, 2015	邓振华，2015
139	Hunan	Lixian	Sunjia	Shijiahe		Longshan period	111.64	29.6702	0	1	Fan XJ et al. 2018	范宪军等，2018
140	Jiangsu	Xinghua	Jiangzhuang	late Liangzhu		Longshan period	120.199	32.7558	3	0	Wu WW et al. 2019	吴文婉等，2019
141	Liaoning	Lvshun	Wangjiacun	Xiaozhuashan IV (Longshan)	4500–4000	Longshan period	121.52	38.87	0	21	Ma YC et al. 2015	马永超等，2015《北方文物》
142	Gansu	Jiuquan	Ganggangwa	Machang-Siba	4285–3752	Brongze Age	99.095	40.2119	2	0	Zhou XY et al. 2016 QI	Zhou Xinying et al. 2016 QI
143	Gansu	Jiuquan	Huoshiliang	Machang-Siba	4135–3690	Brongze Age	98.5664	39.7492	10	0	Zhou XY et al. 2016 QI	Zhou Xinying et al. 2016 QI
144	Gansu	Wuwei	Huangniangniangtai	Qijia	4125–3691	Brongze Age	102.606	37.9353	4	0	Zhou XY et al. 2016 QI	Zhou Xinying et al. 2016 QI
145	Gansu	Minle	Donghuishan	Siba	3880–3434	Brongze Age	100.726	38.65	2	0	Zhou XY et al. 2016 QI	Zhou Xinying et al. 2016 QI
146	Gansu	Lingtai	Qiaocun	Qijia		Brongze Age	107.49	35.15	1	0	Chen TT et al. 2019	陈亭亭等，2019
147	Gansu	Lingtai	Jiangjiazui	Qijia		Brongze Age	107.44	35.04	1	0	Chen TT et al. 2019	陈亭亭等，2019
148	Qinghai	Huzhu	Jinchankou	Qijia	4200–3750	Brongze Age	102.54	36.92	0	1	Yang Y. 2014	杨颖，2014
149	Qinghai	Minhe	Lajia2013	Qijia	4200–3500	Brongze Age	102.81	35.86	42	254	Zhang C. 2013	张晨，2013
150	Shaanxi	Zhouyuan	Wangjiazui	Pre-Zhou Dynasty	4000–3046	Brongze Age	107.6	34.48	37	0	Zhao ZJ. 2004	周原考古队，2004
151	Shaanxi	Zhouyuan	Zhuangli	Western Zhou Dynasty	3046–2771	Brongze Age	107.87	34.47	3	0	Zhao ZJ. 2011	赵志军，2011
152	Shaanxi	Fufeng	Anban	Western Zhou Dynasty	3046–2771	Brongze Age	107.92	34.35	1	0	Liu XY, 2014	刘晓媛，2014
153	Shaanxi	Huaxian	Dongyang	Western Zhou Dynasty		Brongze Age	110.064	34.6262	142	5	Zhao ZJ. 2019	赵志军，2019
154	Shaanxi	Xunyi	Zaolinhetan	Shang-Zhou Dynasty		Brongze Age	108.285	35.0104	162	0	Chen SY et al. 2019	陈思源等，2019
155	Beijing	Fangshan	Dingjiawa	Eastern Zhou Dynasty	2770–2221	Brongze Age	116	39.72	13	0	Zhao ZJ. 2008	赵志军，2008(附于书后)
156	Shanxi	Jiangxian	Beiyang	Erlitou	3900–3600	Brongze Age	111.534	35.4765	4	0	Song JX et al. 2017 AAS	Song et al.2017
157	Shanxi	Jiangxian	Jiajiabao	Erlitou	3900–3600	Brongze Age	111.469	35.5051	86	0	Song JX et al. 2017 AAS	Song et al.2017
158	Shanxi	Jiangxian	Xinzhuang	Erlitou	3900–3600	Brongze Age	111.655	35.4055	36	0	Song JX et al. 2017 AAS	Song et al.2017
159	Shanxi	Xiaxian	Yueyabao I	Erlitou	3900–3600	Brongze Age	111.095	35.2698	3	0	Song JX et al. 2017 AAS	Song et al.2017
160	Shanxi	Xiaxian	Xiaozhuang	Erlitou	3600–3300	Brongze Age	111.077	35.2617	20	0	Song JX et al. 2017 AAS	Song et al.2017
161	Shanxi	Xiaxian	Yueyabao I	Erlitou	3600–3300	Brongze Age	111.095	35.2698	47	0	Song JX et al. 2017 AAS	Song et al.2017
162	Shanxi	Wenxi	Liujiazhuang	Shang Dynasty	3300–3100	Brongze Age	111.591	35.336	6	0	Song JX et al. 2017 AAS	Song et al.2017
163	Shanxi	Houma	Niucungucheng	Eastern Zhou Dynasty		Brongze Age	111.336	35.6264	unknown	0	Zhou KS et al. 2003	周昆叔等，2003 中国文物信息网
164	Henan	Dengfeng	Wangchenggang	Erlitou	3900–3600	Brongze Age	113.12	34.38	2	0	Zhao ZJ et al. 2007	赵志军等，2007
165	Henan	Dengfeng	Wangchenggang	Erligang	3600–3300	Brongze Age	113.12	34.38	12	0	Zhao ZJ et al. 2007	赵志军等，2007
166	Henan	Dengfeng	Wangchenggang	Spring and Autumn Period	2770–2403	Brongze Age	113.12	34.38	1	0	Zhao ZJ et al. 2007	赵志军等，2007
167	Henan	Dengfeng	Nanwa	Erlitou	3750–3500	Brongze Age	113.233	34.667	96	0	Wu WW et al. 2014	吴文婉等，2014
168	Henan	Dengfeng	Nanwa	Shang Dynasty	3300–3046	Brongze Age	113.233	34.667	28	0	Wu WW et al. 2014	吴文婉等，2014
169	Henan	Dengfeng	Nanwa	Spring and Autumn Period	2770–2403	Brongze Age	113.233	34.667	2	0	Wu WW et al. 2014	吴文婉等，2014
170	Henan	Dengfeng	Chengyao	Eastern Zhou Dynasty		Brongze Age	113.051	34.294	802	0	Zhong H et al. 2018	钟华等，2018
171	Henan	Yanshi	Erlitou	Erlitou		Brongze Age	112.68	34.7	80	0	Zhao ZJ. 2007	赵志军，2007《科技考古（二）》
172	Henan	Yanshi	Erlitou	Erligang		Brongze Age	112.68	34.7	22	0	Zhao ZJ. 2007	赵志军，2007《科技考古（二）》
173	Henan	Yanshi	Erlitou	Erlitou I		Brongze Age	112.68	34.7	1	0	Zhao ZJ et al. 2019	赵志军等，2019
174	Henan	Yanshi	Erlitou	Erlitou II		Brongze Age	112.68	34.7	69	5	Zhao ZJ et al. 2019	赵志军等，2019
175	Henan	Yanshi	Erlitou	Erlitou II		Brongze Age	112.68	34.7	39	0	Zhao ZJ et al. 2019	赵志军等，2019
176	Henan	Yanshi	Erlitou	Erlitou IV		Brongze Age	112.68	34.7	39	24	Zhao ZJ et al. 2019	赵志军等，2019
177	Henan	Yanshi	Erlitou	late Erligang		Brongze Age	112.68	34.7	28	64	Zhao ZJ et al. 2019	赵志军等，2019
178	Henan	Xichuan	Wuying	Spring and Autumn Period	2770–2403	Brongze Age	111.5	32.93	2	0	Wang YQ et al. 2010	王育茜等，2010
179	Henan	Xichuan	Xiawanggang	Western Zhou Dynasty	3046–2221	Brongze Age	111.367	33.0167	86	0	Tang LY. 2014	唐丽雅，2014
180	Henan	Xinmi	Xinzhai	Xinzhai		Brongze Age	113.55	34.43	150	0	Zhong H et al. 2015	钟华等，2015
181	Henan	Xingyang	Guanzhuang	Western Zhou Dynasty	3046–2221	Brongze Age	113.367	34.85	20	0	Lan WL et al. 2015	蓝万里等，2015《东方考古（11）》
182	Henan	Xingyang	Guanzhuang	Spring and Autumn Period	2770–2403	Brongze Age	113.367	34.85	2	0	Lan WL et al. 2015	蓝万里等，2015《东方考古（11）》
183	Henan		Huizui	Erlitou	3640±60; 3600±70	Brongze Age	112.767	34.574	2	6	Lee GA et al. 2007 PNAS	Lee et al. 2007
184	Henan		Luokou	Erlitou	4000–3500	Brongze Age	112.984	34.6675	1	0	Lee GA et al. 2007 PNAS	Lee et al. 2007
185	Henan		Shaochai	Erlitou	4000–3500	Brongze Age	112.924	34.709	11	1	Lee GA et al. 2007 PNAS	Lee et al. 2007
186	Henan		Feiyaodongnan	Erligang	3510±40	Brongze Age	112.967	34.6822	0	9	Lee GA et al. 2007 PNAS	Lee et al. 2007
187	Henan		Shangzhuang	Erligang	3500–3300	Brongze Age	113.088	34.6091	2	0	Lee GA et al. 2007 PNAS	Lee et al. 2007
188	Henan		Tianposhuiku	Erligang	3060±50; 3020±50	Brongze Age	112.944	34.6504	5	9	Lee GA et al. 2007 PNAS	Lee et al. 2007
189	Henan		Shaochai+	Erlitou		Brongze Age	112.924	34.709	5	0	Zhang JN et al. 2014	张俊娜等，2014
190	Henan		Matunbei	Erlitou II		Brongze Age	112.878	34.5757	1	0	Zhang JN et al. 2014	张俊娜等，2014
191	Henan	Zhengzhou	Dongzhao	Xinzhai		Brongze Age	113.506	34.7925	0	25	Yang YZ et al. 2017	杨玉璋等，2017
192	Henan	Zhengzhou	Dongzhao	Erlitou		Brongze Age	113.506	34.7925	176	0	Yang YZ et al. 2017	杨玉璋等，2017
193	Henan	Zhengzhou	Dongzhao	Erligang		Brongze Age	113.506	34.7925	158	0	Yang YZ et al. 2017	杨玉璋等，2017
194	Henan	Zhengzhou	Dongzhao	Western Zhou Dynasty		Brongze Age	113.506	34.7925	5	0	Yang YZ et al. 2017	杨玉璋等，2017
195	Henan	Zhengzhou	Xiaoshuangqiao	Shang Dynasty	3400	Brongze Age	113.566	34.8519	18	0	Zhong H et al. 2018	钟华等，2018
196	Henan	Yancheng	Haojiatai	Xinzhai		Brongze Age	114.037	33.5983	25	0	Deng ZH et al. 2017	邓振华等，2017
197	Henan	Huaiyang	Pingliangtai	Shang Dynasty		Brongze Age	114.934	33.7135	3	0	Deng ZH et al. 2017	邓振华等，2017
198	Henan	Xingyang	Xizhang	Erligang		Brongze Age	113.368	34.874	0	1	Qiu ZW et al. 2018	邱振威等，2018
199	Henan	Xingyang	Nidian	Erligang		Brongze Age	113.396	34.8761	0	1	Qiu ZW et al. 2018	邱振威等，2018
200	Henan	Xingyang	Tangdong	Erligang		Brongze Age	113.411	34.9092	0	2	Qiu ZW et al. 2018	邱振威等，2018
201	Henan	Zhongyuan	Gangcui	Erligang		Brongze Age	113.493	34.8392	0	2	Qiu ZW et al. 2018	邱振威等，2018
202	Henan	Xichuan	Shenmingpu	Spring and Autumn Period		Brongze Age	111.296	33.0131	0	6	Liu H et al. 2017	刘焕等，2017
203	Henan	Gongyi	Huadizui	Xinzhai		Brongze Age	113.074	34.8027	18	1	Tang LY et al. 2018	唐丽雅等，2018
204	Henan	Gongyi	Huadizui	Erlitou		Brongze Age	113.074	34.8027	10	0	Tang LY et al. 2018	唐丽雅等，2018
205	Henan	Luoyang	Zaojiaoshu	Xia Dynasty		Brongze Age	112.47	34.6	unknown	0	Luoyang cultural relics team. 2002	洛阳市文物工作队，2002
206	Henan	Xiping	Shangpo	Xia Dynasty		Brongze Age	114.1	33.48	10	0	Wei XT et al. 2007	魏兴涛等，2007
207	Anhui	Bengbu	Diaoyutai	Western Zhou Dynasty		Brongze Age	117.333	32.9	13	0	Zhang J et al. 2018	张娟等，2018
208	Anhui	Suzhou	Yangpu	Yueshi		Brongze Age	117.118	34.0603	0	8	Cheng ZJ et al. 2016	程志杰等，2016b
209	Anhui	Suzhou	Yangpu	Warring States Period		Brongze Age	117.118	34.0603	0	24	Cheng ZJ et al. 2016	程志杰等，2016b
210	Anhui	Suzhou	Luchengzi	Western Zhou Dynasty		Brongze Age	116.957	33.4814	1	2	Wang YQ et al. 2016	王育茜等，2016
211	Shandong	Jinan	Daxinzhuang	Shang Dynasty	3558–3046	Brongze Age	117.1	36.7	7	0	Chen XX et al. 2008	陈雪香等，2008《东方考古（4）》
212	Shandong	Jinan	Daxinzhuang	Shang Dynasty	3442–3290	Brongze Age	117.1	36.7	951	8	Gong W et al. 2016	宫玮，2016
213	Shandong	Jinan	Liujiazhuang	Shang Dynasty	3086–2919	Brongze Age	117.1	36.7	167	0	Gong W et al. 2016	宫玮，2016
214	Shandong	Jinan	Pengjiazhuang	Yueshi	3950–3500	Brongze Age	117.22	36.7	14	0	Wu WW et al. 2010	吴文婉等，2010《东方考古（7）》
215	Shandong	Jinan	Tangye2008	Zhou Dynasty	3046–2771–2221	Brongze Age	117.23	36.68	12	0	Zhao M et al. 2008	赵敏等，2008
216	Shandong	Jinan	Tangye2014	Western Zhou Dynasty		Brongze Age	117.217	36.6833	24	0	An JP et al. 2016	安静平等，2016
217	Shandong	Zhangqiu	Maan	Yueshi	3950–3500	Brongze Age	117.48	36.68	3	0	Chen XX et al. 2008	陈雪香等，2008《东方考古方考古（5）》
218	Shandong	Zhangqiu	Ningjiabu	Shang Dynasty		Brongze Age	117.445	36.8268	2	0	Wei N et al. 2018	魏娜等，2018
219	Shandong	Zhangqiu	Ningjiabu	Eastern Zhou Dynasty		Brongze Age	117.445	36.8268	7	0	Wei N et al. 2018	魏娜等，2018
220	Shandong	Rizhao	Jijiagou	Western Zhou Dynasty	3046–2771	Brongze Age	118.92	35.47	1	0	Chen XX et al. 2009	陈雪香等，2009《东方考古（6）》
221	Shandong	Qingdao	Henanzhuang	Zhou Dynasty		Brongze Age	120.417	36.1474	4	0	Wei N et al. 2018	魏娜等，2018
222	Shandong	Jimo	Beiqian2007	Zhou Dynasty	3046–2771–2221	Brongze Age	120.73	36.6	69	0	Jin GY et al. 2013	靳桂云等，2013《东方考古（10）》
223	Shandong	Linshu	Dongpan	Western Zhou Dynasty	3046–2771	Brongze Age	118.75	34.92	0	1	Wang HY et al. 2012	王海玉等，2012《东方考古（8）》
224	Shandong	Yangtai	Zhaogezhuang	Yueshi	3800–3500	Brongze Age	121.62	37.37	4	34	Jin GY et al. 2011	靳桂云等，2011《东方考古（6）》
225	Shandong	Laoling	Yinjia	Yueshi	3950–3500	Brongze Age	117.117	37.517	7	7	Zheng XQ et al. 2013	郑晓蕖等，2013《海岱考古（6）》
226	Shandong	Heze	Shilipubei	Yueshi		Brongze Age	115.639	35.0435	116	5	Guo RZ et al. 2019	郭荣臻等，2019
227	Shandong	Heze	Shilipubei	Shang Dynasty		Brongze Age	115.639	35.0435	357	3	Guo RZ et al. 2019	郭荣臻等，2019
228	Shandong	Heze	Shilipubei	Eastern Zhou Dynasty		Brongze Age	115.639	35.0435	20	0	Guo RZ et al. 2019	郭荣臻等，2019
229	Sichuan	Chengdu	Jinniuqu No.5C	Shang Dynasty	3301–3046	Brongze Age	104.05	30.6833	0	1	Jiang M et al. 2011	姜铭等，2011
230	Sichuan	Xindu	Chujiacun	Shierqiao	3500–3000	Brongze Age	104.217	30.8167	0	1	Shi T et al. 2012	石涛，2012
231	Sichuan	Langzhong	Zhengjiaba	Shang-Zhou Dynasty	3558–2221	Brongze Age	106.25	31.45	0	1	Yan X et al. 2013	闫雪等，2013
232	Sichuan	Xichang	Shapingba	Western Zhou Dynasty	3000–2900	Brongze Age	102.146	27.753	0	1	Yan X et al. 2014	闫雪等，2014《成都考古发现》
233	Yunnan	Jianchuan	Haimenkou	Shang-Zhou Dynasty	3750–3000; 2760–2400	Brongze Age	99.9167	26.4667	0	95	Xue YN. 2013	薛轶宁，2013
234	Yunnan	Chengjiang	Xueshan	Shizhaishan	2475–2221	Brongze Age	102.933	24.65	63	3	Wang Q. 2014	王祁，2014
235	Yunnan	Lushui	Shilinggang		2723–2339	Brongze Age	98.8764	25.6586	1	0	Li H et al.2016	Li Haiming et al.2016
236	Yunnan	Dongchuan	Yubeidi	early Bronze		Brongze Age	103.143	26.1923	20	0	Yang et al. 2016	杨薇，2016
237	Yunnan	Jinning	Heposuo	Shizhaishan		Brongze Age	102.612	24.7213	9	0	Yang et al. 2016	杨薇，2016
238	Hubei	Fangxian	Jijiawan	Western Zhou Dynasty	3046–2771	Brongze Age	110.7	32.0833	1	0	Tang LY. 2014	唐丽雅，2014
239	Hubei	Jingmen	Qujialing	Warring States Period	2320–2117	Brongze Age	112.903	30.8331	6	0	Yao L et al. 2019	姚凌等，2019
240	Jiangsu	Zhenjiang	Dingjiacun	Western Zhou Dynasty-Spring and Autumn Period	3000–2860	Brongze Age	119.349	32.1073	0	2	Wu WW et al. 2017	吴文婉等，2017
241	Inner Mongolia	Aohan	Xinglonggou III	lower Xiajiadain	4000–3500	Brongze Age	120.67	42.37	14	17	Zhao ZJ. 2011	赵志军，2011《科技考古（3）》
242	Inner Mongolia	Songshan	Sanzuodian	lower Xiajiadain	4000–3500	Brongze Age	118.62	42.35	16	0	Zhao ZJ. 2011	赵志军，2011《科技考古（3）》
243	Inner Mongolia	Chifeng	Erdaojingzi	lower Xiajiadain	4000–3500	Brongze Age	119.183	44.3	179	0	Sun YG. 2014	孙永刚，2014《农业考古》
244	Inner Mongolia	Kulun	Sanjiazi	Gaotaishan		Brongze Age	121.215	42.9397	0	1	Liu W et al. 2016	刘玮等，2016
245	Inner Mongolia	Chifeng	Xianglushan	lower Xiajiadain	3830–3480	Brongze Age	119.167	42.3667	2	1	Jia X et al. 2016 Holocence	Jia Xin et al. 2016 Holocence
246	Inner Mongolia	Chifeng	Xianglushan	upper Xiajiadain	3140–2350	Brongze Age	119.167	42.3667	0	1	Jia X et al. 2016 Holocence	Jia Xin et al. 2016 Holocence
247	Inner Mongolia	Chifeng	Xianglushan	lower Xiajiadain		Brongze Age	119.167	42.3667	2	8	Jia X et al. 2018	贾鑫等，2018
248	Inner Mongolia	Chifeng	Xidaodianjiangtai	lower Xiajiadain		Brongze Age	118.765	42.2217	2	0	Jia X et al. 2018	贾鑫等，2018
249	Inner Mongolia	Chifeng	Xianglushan	upper Xiajiadain		Brongze Age	119.167	42.3667	0	1	Jia X et al. 2018	贾鑫等，2018
250	Liaoning	Lvshun	Wangjiacun	Eastern Zhou Dynasty	2770–2221	Brongze Age	121.52	38.87	0	1	Ma YC et al. 2015	马永超等，2015《北方文物》
251	Heilongjiang	Ningan	Damudantun	Zhou Dynasty	3000	Brongze Age	129.31	44.2658	unknown	0	Zhou KS et al. 2003	周昆叔等，2003 中国文物信息网
252	Heilongjiang	Ningan	Niuchang	Zhou Dynasty	3000	Brongze Age	129.229	44.1598	unknown	0	Zhou KS et al. 2003	周昆叔等，2003 中国文物信息网
253	Jilin	Yongji	Wulajie	Zhou Dynasty	3000	Brongze Age	126.48	44.0957	unknown	0	Zhou KS et al. 2003	周昆叔等，2003 中国文物信息网
254	Jilin	Yongji	Dahaimeng	Xituanshan	2600	Brongze Age	126.467	44.132	unknown	0	Zhou KS et al. 2003	周昆叔等，2003 中国文物信息网

## Sheet: Fish
Table S2. Detailed information of archaeological sites with fish remains excavated in southern China
No.	Province	City/county	Site	River system	Age or Culture (cal BP)	Period	Longitude	Latitude	Reference	Original reference
1	Guangxi	Guilin	Zengpiyan	Pearl River	Neolithic	Peiligang period	110.29	25.2193	Li YH et al. 1978	李有恒 等，1978
2	Henan	Wuyang	Jiahu	Huai River	9000–7500	Peiligang period	113.681	33.619	Zhang JZ et al. 2014	张居中 等，2014
3	Henan	Wuyang	Jiahu	Huai River	9000–7800	Peiligang period	113.681	33.619	Henan Provincial Institute of Relics and Archaeology, 1999	河南省文物考古研究所，1999
4	Hubei	Badong	Nanmuyuan	upper Yangtze River	Chengbeixi culture	Peiligang period	110.314	31.1351	Three Gorges Project Construction Committee Office of The State Council, 2006	国务院三峡工程建设委员会办公室，2006
5	Hubei	Zigui	Dongmentou	middle Yangtze River	Chengbeixi culture 8500–7000	Peiligang period	110.744	30.9633	Three Gorges Project Construction Committee Office of The State Council, 2010	国务院三峡工程建设委员会办公室，2010
6	Hubei	Yidu	Chengbeixi	middle Yangtze River		Peiligang period	111.441	30.4771	Li TY. 2001	李天元，2001
7	Hunan	Lixian	Pengtoushan	middle Yangtze River	8500–7500	Peiligang period	111.684	29.6872	Hunan Provincial Institute of Relics and Archaeology, 2006	湖南省文物考古研究所，2006
8	Hunan	Lixian	Bashidang	middle Yangtze River	8500–7500	Peiligang period	111.684	29.6872	Hunan Provincial Institute of Relics and Archaeology, 2006	湖南省文物考古研究所，2006
9	Hunan	Hongjiang	Gaomiao	middle Yangtze River	7800–5300	Peiligang period	110.17	27.3669	Mo LH. 2011	莫林恒，2011
10	Anhui	Bengbu	Shuangdun	Huai River	7300	Peiligang period	117.332	32.9895	Anhui Provincial Institute of Relics and Archaeology, 2008	安徽省文物考古研究所，2008
11	Zhejiang	Hangzhou	Kuahuqiao	lower Yangtze River	7000–8000	Peiligang period	120.228	30.1482	Zhejiang Provincial Institute of Relics and Archaeology, 2004	浙江省文物考古研究所，2004
12	Zhejiang	Hangzhou	Xiasun	lower Yangtze River		Peiligang period	120.233	30.15	Zhu XC et al. 2020	朱旭初 等，2020
13	Guangxi	Nanning	Baozitou	Pearl River	10000–7000	Peiligang period	108.346	22.7787	Lv P. 2011	吕鹏，2011
14	Guangxi	Nanning	Dingshishan	Pearl River	8000	Peiligang period	108.479	22.7312	Lv P. 2011	吕鹏，2011
15	Henan	Wuyang	Jiahu	Huai River	9000–7500	Peiligang period	113.681	33.619	Henan Provincial Institute of Relics and Archaeology, 2015	河南省文物考古研究所，2015
16	Henan	Wuyang	Jiahu	Huai River	9000–7500	Peiligang period	113.681	33.619	Nakajima T et al. 2015	中岛经夫 等，2015
17	Chongqing	Wushan	Daxi	upper Yangtze River	Neolithic	Early Yangshao period	109.627	31.0067	Fan GJ et al. 1981	范桂杰 等，1981
18	Chongqing	Fengdu	Yuxi	upper Yangtze River	6300–5900	Early Yangshao period	107.861	30.0372	Zhao JF et al. 2012	赵静芳 等，2012
19	Chongqing	Fengdu	Yuxi	upper Yangtze River	Neolithic	Early Yangshao period	107.861	30.0372	Li F. 2014	李凤，2014
20	Hubei	Badong	Nanmuyuan	upper Yangtze River	Daxi culture	Early Yangshao period	110.314	31.1351	Three Gorges Project Construction Committee Office of The State Council, 2006	国务院三峡工程建设委员会办公室，2006
21	Hubei	Badong	Dianzitou	upper Yangtze River	early Neolithic	Early Yangshao period	110.286	31.1532	Wu XZ. 2007	武仙竹，2007
22	Hubei	Badong	Yazizui	upper Yangtze River	Daxi culture	Early Yangshao period	110.348	31.074	Li YH et al. 2014	李英华 等，2014
23	Hubei	Zigui	Liulinxi	middle Yangtze River	Daxi culture	Early Yangshao period	110.888	30.8966	Li YH et al. 2014	李英华 等，2014
24	Hubei	Yichang	Qingshuitan	middle Yangtze River	Daxi culture,Qujialing culture	Early Yangshao period	110.492	31.0146	Xiang XC et al. 1988	向绪成 等，1988
25	Hubei	Yichang	Zhongbaodao	middle Yangtze River	Daxi culture	Early Yangshao period	111.008	30.8146	Li YH et al. 2014	李英华 等，2014
26	Hubei	Yichang	Lijiahe	middle Yangtze River	Daxi culture	Early Yangshao period	111.257	30.7184	Liu XT. 1957	刘憲亭，1957
27	Hubei	Yichang	Chaotianzui	middle Yangtze River	Daxi culture	Early Yangshao period	110.992	30.8454	Li YH et al. 2014	李英华 等，2014
28	Hubei	Huangmei	Saidun	middle Yangtze River	6500–4600	Early Yangshao period	116.035	29.8728	Mo LH. 2016	莫林恒，2016
29	Hubei	Changyang	Weiganping	middle Yangtze River	Daxi culture 6400–5300	Early Yangshao period	110.383	30.4483	Chen QJ et al. 2004	陈全家，2004
30	Hubei	Changyang	Xisiping	middle Yangtze River	Daxi culture 6400–5300	Early Yangshao period	111.167	30.4791	Li YH et al. 2014	李英华 等，2014
31	Hubei	Changyang	Shazui	middle Yangtze River	Daxi culture 6400–5300	Early Yangshao period	111.213	30.4774	Li YH et al. 2014	李英华 等，2014
32	Hubei	Changyang	Shentanwan	middle Yangtze River	Daxi culture 6400–5300	Early Yangshao period	111.213	30.4774	Li YH et al. 2014	李英华 等，2014
33	Hunan	Lixian	Sanyuangong	middle Yangtze River	Daxi culture,Qujialing culture	Early Yangshao period	111.834	29.7781	Hunan Museum, 1979	湖南省博物馆，1979
34	Anhui	Dingyuan	Houjiazhai	Huai River	5200–6900	Early Yangshao period	117.272	32.5179	Dai LL et al. 2017	戴玲玲 等，2017
35	Anhui	Suixi	Shishanzi	Huai River	6300–6900	Early Yangshao period	116.83	33.8483	Han LG. 1992	韩立刚，1992
36	Anhui	Suixi	Shishanzi	Huai River	Neolithic	Early Yangshao period	116.83	33.8483	Hunan Provincial Institute of Relics and Archaeology, 2017	安徽省文物考古研究所，2017
37	Jiangsu	Yixing	Xixi	lower Yangtze River	7000–6000	Early Yangshao period	119.604	31.4957	Song YB et al. 2016	宋艳波 等，2016
38	Jiangsu	Liyang	Shendun	lower Yangtze River	7000–6000	Early Yangshao period	119.23	31.3146	Song YB et al. 2016	宋艳波 等，2016
39	Jiangsu	Liyang	Shendun	lower Yangtze River	7000–6000	Early Yangshao period	119.23	31.3146	Nanjing Museum et al. 2016	南京博物馆 等，2016
40	Jiangsu	Changzhou	Weidun	lower Yangtze River	Neolithic	Early Yangshao period	120.064	31.7231	Huang WJ. 1978	黄文几，1978
41	Jiangsu	Changzhou	Weidun	lower Yangtze River	Neolithic	Early Yangshao period	120.064	31.7231	Huang XH. 1991	黄象洪，1991
42	Jiangsu	Changzhou	Weidun	lower Yangtze River	Neolithic	Early Yangshao period	120.064	31.7231	Song YB. 2019	宋艳波，2019
43	Jiangsu	Gaoyou	Longqiuzhuang	Huai River	6800–5500	Early Yangshao period	119.52	32.8362	Li MC et al. 1997	李民昌 等，1997
44	Jiangsu	Yixing	Luotuodun	lower Yangtze River	7000–5000	Early Yangshao period	119.817	31.3333	Zhu XC et al. 2020	朱旭初 等，2020
45	Jiangsu	Haian	Qingdun	Huai River	6000	Early Yangshao period	120.25	32.6	Zhu XC et al. 2020	朱旭初 等，2020
46	Jiangsu	Jintan	Sanxingcun	lower Yangtze River	6500	Early Yangshao period	119.483	31.6833	Zhu XC et al. 2020	朱旭初 等，2020
47	Zhejiang	Tongxiang	Luojiajiao	lower Yangtze River	6905±155	Early Yangshao period	120.475	30.6348	Zhang MK. 1981	张梅坤，1981
48	Zhejiang	Tongxiang	Luojiajiao	lower Yangtze River	6905±155	Early Yangshao period	120.475	30.6348	Zhang MH. 1981	张明华，1981
49	Zhejiang	Jiaxing	Majiabang	lower Yangtze River	late Majiabang	Early Yangshao period	120.712	30.7077	Song YB. 2019	宋艳波，2019
50	Zhejiang	Tongxiang	Luojiajiao	lower Yangtze River	6905±155	Early Yangshao period	120.475	30.6348	Song YB. 2019	宋艳波，2019
51	Zhejiang	Yuyao	Hemudu	lower Yangtze River	6000–7000	Early Yangshao period	121.356	29.9672	Wei F et al. 1990	魏丰 等，1990
52	Zhejiang	Yuyao	Hemudu	lower Yangtze River	7000	Early Yangshao period	121.356	29.9672	Zhejiang Museum, 1978	浙江省博物馆自然组，1978
53	Zhejiang	Ningbo	Fujiashan	lower Yangtze River	7260–6360	Early Yangshao period	121.428	30.0221	Ningbo Municipal Institute of Cultural Relics and Archaeology, 2013	宁波市文物考古研究所，2013
54	Zhejiang	Yuyao	Tianluoshan	lower Yangtze River	6500	Early Yangshao period	121.39	30.0274	Nakajima T et al. 2011	中岛经夫 等，2011
55	Zhejiang	Yuyao	Tianluoshan	lower Yangtze River	6500	Early Yangshao period	121.39	30.0274	Sun GP. 2013	孙国平，2013
56	Zhejiang	Yuyao	Zishan	lower Yangtze River		Early Yangshao period	121.217	29.95	Zhu XC et al. 2020	朱旭初 等，2020
57	Zhejiang	Jiaxing	Xinqiao	lower Yangtze River		Early Yangshao period	120.432	30.5237	Song YB et al. 2016	宋艳波 等，2016
58	Fujian	Pingtan	Qiaoqiutou	southeastern China	Neolithic	Early Yangshao period	119.76	25.6282	Fan XC et al. 2009	范雪春 等，2009
59	Fujian	Pingtan	Qiaoqiutou	southeastern China	Neolithic	Early Yangshao period	119.76	25.6282	Lin GW. 1991	林公务，1991
60	Guangxi	Baise	Gexinqiao	Pearl River	Neolithic	Early Yangshao period	106.578	23.8822	Song YB et al. 2016	宋艳波 等，2016
61	Guangxi	Baise	Baida	Pearl River		Early Yangshao period	106.651	23.7888	Song YB et al. 2016	宋艳波 等，2016
62	Guangxi	Baise	Kantun	Pearl River		Early Yangshao period	106.641	23.8298	Song YB et al. 2016	宋艳波 等，2016
63	Guangxi	Nanning	Baozitou	Pearl River	10000–7000	Early Yangshao period	108.346	22.7787	Lv P. 2011	吕鹏，2011
64	Guangxi	Nanning	Huiyaotian	Pearl River		Early Yangshao period	108.43	22.8156	Lv P. 2011	吕鹏，2011
65	Guangxi	Nanning	Dingshishan	Pearl River	7000	Early Yangshao period	108.479	22.7312	Lv P. 2011	吕鹏，2011
66	Guangxi	Nanning	Lingwu	Pearl River		Early Yangshao period	108.538	22.8219	Lv P. 2011	吕鹏，2011
67	Guangxi	Nanning	Niulanshi	Pearl River		Early Yangshao period	108.574	22.8339	Lv P. 2011	吕鹏，2011
68	Guangxi	Nanning	Dingshishan	Pearl River		Early Yangshao period	108.667	22.8405	Lv P. 2011	吕鹏，2011
69	Guangxi	Longzhou	Baojianshan A	Pearl River		Early Yangshao period	107.043	22.3608	Chen X et al. 2019	陈曦 等，2019
70	Guangxi	Longzhou	Wumingshan	Pearl River		Early Yangshao period	107.043	22.3608	Chen X et al. 2019	陈曦 等，2019
71	Guangxi	Longzhou	Dawan	Pearl River		Early Yangshao period	106.913	22.3319	Chen X et al. 2019	陈曦 等，2019
72	Guangxi	Longzhou	Gencun	Pearl River		Early Yangshao period	107.036	22.3853	Chen X et al. 2019	陈曦 等，2019
73	Guangxi	Longzhou	Pojiaohuan	Pearl River		Early Yangshao period	107.036	22.3853	Chen X et al. 2019	陈曦 等，2019
74	Henan	Dengzou	Baligang	middle Yangtze River	Yangshao culture	Early Yangshao period	112.143	32.6931	Wang H et al. 2021	王华 等，2021
75	Hubei	Yichang	Qingshuitan	middle Yangtze River	Daxi culture,Qujialing culture	Late Yangshao period	110.492	31.0146	Xiang XC. 1988	向绪成，1988
76	Hubei	Yunxian	Dasi	middle Yangtze River	Yangshao culture	Late Yangshao period	110.779	32.8703	Liu YT et al. 2021	刘一婷 等，2021
77	Hunan	Lixian	Sanyuangong	middle Yangtze River	Daxi culture,Qujialing culture	Late Yangshao period	111.834	29.7781	Hunan Museum, 1979	湖南省博物馆，1979
78	Shanghai	Qingpu	Songze	lower Yangtze River	6000–5000	Late Yangshao period	121.171	31.1531	Huang XH et al. 1987	黄象洪 等，1987
79	Anhui	Bozhou	Houtieying	Huai River	6100–4600	Late Yangshao period	116.006	33.6503	Da LL et al. 2018	戴玲玲 等，2018
80	Anhui	Mengcheng	Yuchisi	Huai River	Dawenkou culture, Longshan culture	Late Yangshao period	116.764	33.3572	Institute of Archaeology, CASS, 2007	中国社会科学院考古研究所，2007
81	Jiangsu	Zhangjiagang	Dongshancun	lower Yangtze River	Songze culture	Late Yangshao period	120.4	31.9167	Zhu XC et al. 2020	朱旭初 等，2020
82	Jiangsu	Kunshan	Saoqingshan	lower Yangtze River	Songze culture, Liangzhu culture	Late Yangshao period	121	31.2667	Zhu XC et al. 2020	朱旭初 等，2020
83	Jiangsu	Gaochun	Xuecheng	lower Yangtze River	late Majiabang	Late Yangshao period	118.85	31.35	Zhu XC et al. 2020	朱旭初 等，2020
84	Jiangsu	Wuxian	Caoxieshan	lower Yangtze River	late Majiabang	Late Yangshao period	120.8	31.3667	Zhu XC et al. 2020	朱旭初 等，2020
85	Jiangsu	Wujiang	Longnan	lower Yangtze River	Songze culture, Liangzhu culture	Late Yangshao period	120.583	30.9833	Zhu XC et al. 2020	朱旭初 等，2020
86	Jiangsu	Kunshan	Chuodun	lower Yangtze River	late Majiabang	Late Yangshao period	120.85	31.4	Zhu XC et al. 2020	朱旭初 等，2020
87	Zhejiang	Hangzhou	Liangzhu	lower Yangtze River	5300–4300	Late Yangshao period	119.998	30.3994	Yu WJ. 2013	俞为洁，2013
88	Zhejiang	Ningbo	Wuguishan	lower Yangtze River	Hemudu culture, Liangzhu culture	Late Yangshao period	121.564	30.0357	Zhu XC et al. 2020	朱旭初 等，2020
89	Guangxi	Hengxian	Jiangkou	Pearl River	middle Neolithic	Late Yangshao period	109.436	22.7254	Liang XD. 2000	梁旭达，2000
90	Guangxi	Nanning	Dingshishan	Pearl River	6000	Late Yangshao period	108.479	22.7312	Lv P. 2011	吕鹏，2011
91	Guangxi	Nanning	Luoshishan	Pearl River		Late Yangshao period	108.667	22.8405	Lv P. 2011	吕鹏，2011
92	Guangxi	Longzhou	Baojianshan A	Pearl River		Late Yangshao period	107.043	22.3608	Chen X et al. 2019	陈曦 等，2019
93	Guangxi	Longzhou	Wumingshan	Pearl River		Late Yangshao period	107.043	22.3608	Chen X et al. 2019	陈曦 等，2019
94	Guangxi	Longzhou	Dawan	Pearl River		Late Yangshao period	106.913	22.3319	Chen X et al. 2019	陈曦 等，2019
95	Guangxi	Longzhou	Gencun	Pearl River		Late Yangshao period	107.036	22.3853	Chen X et al. 2019	陈曦 等，2019
96	Guangxi	Longzhou	Pojiaohuan	Pearl River		Late Yangshao period	107.036	22.3853	Chen X et al. 2019	陈曦 等，2019
97	Shaanxi	Hanzhong	Longgangsi	middle Yangtze River	6000	Late Yangshao period	106.977	33.0723	Shaanxi Provincial Institute of Relics and Archaeology,1990	陕西省考古研究所，1990
98	Henan	Xichuan	Xiawanggang	middle Yangtze River	late Yangshao	Late Yangshao period	111.376	33.0229	Jia LP et al. 1997	贾兰坡 等，1997
99	Henan	Xichuan	Huanglianshu	middle Yangtze River	late Yangshao	Late Yangshao period	111.334	32.9847	Lin MH. 2011	林明昊，2011
100	Yunnan	Dali	Yinsuodao	upper Yangtze River	late Neolithic	Longshan period	100.269	25.6861	Zhao Y. 2011	赵莹，2011
101	Chongqing	Zhongxian	Zhongbaodao	upper Yangtze River	4400–2400	Longshan period	108.094	30.3983	Zhu C et al. 2015	朱诚，2015
102	Chongqing	Zhongxian	Zhongbaodao	upper Yangtze River	4500–4000	Longshan period	108.094	30.3983	Zhu C et al. 2008	Zhu C，2008
103	Chongqing	Zhongxian	Zhongbaodao	upper Yangtze River	4500–4000	Longshan period	108.094	30.3983	Flad R et al. 2006	付罗文，2006
104	Chongqing	Zhongxian	Wazhadi	upper Yangtze River	late Neolithic	Longshan period	108.05	30.3094	Li YH et al. 2014	李英华 等，2014
105	Hubei	Badong	Dianzitou	upper Yangtze River	late Neolithic	Longshan period	110.286	31.1532	Hu YL et al. 2004	胡雅丽，2004
106	Hubei	Zigui	Guanzhuangping	middle Yangtze River	4700	Longshan period	110.76	31.0331	Wu ZX et al. 2005	武仙竹，2005
107	Hubei	Zigui	Miaoping	middle Yangtze River	Shijiahe	Longshan period	110.907	30.7811	Li YH et al. 2014	李英华 等，2014
108	Jiangsu	Xinghua	Nandang	Huai River		Longshan period	119.946	32.9377	Zhu XC et al. 2020	朱旭初 等，2020
109	Jiangsu	Suzhou	Meiyan	lower Yangtze River	Majibang culture, Liangzhu culture	Longshan period	120.599	30.998	Zhu XC et al. 2020	朱旭初 等，2020
110	Zhejiang	Ningbo	Daxie	lower Yangtze River	Liangzhu culture, Qianshanyang culture	Longshan period	121.97	29.916	Dong NN et al. 2020	董宁宁，2020
111	Zhejiang	Huzhou	Qianshanyang	lower Yangtze River	Qianshangyang culture	Longshan period	120.133	30.8333	Zhu XC et al. 2020	朱旭初 等，2020
112	Guangxi	Longzhou	Baojianshan A	Pearl River	late Neolithic	Longshan period	107.043	22.3608	Chen X et al. 2019	陈曦 等，2019
113	Guangxi	Longzhou	Wumingshan	Pearl River	late Neolithic	Longshan period	107.043	22.3608	Chen X et al. 2019	陈曦 等，2019
114	Guangxi	Longzhou	Dawan	Pearl River	late Neolithic	Longshan period	106.913	22.3319	Chen X et al. 2019	陈曦 等，2019
115	Guangxi	Longzhou	Gencun	Pearl River	late Neolithic	Longshan period	107.036	22.3853	Chen X et al. 2019	陈曦 等，2019
116	Guangxi	Longzhou	Pojiaohuan	Pearl River	late Neolithic	Longshan period	107.036	22.3853	Chen X et al. 2019	陈曦 等，2019
117	Guangdong	Gaoming	Guye	Pearl River	late Neolithic	Longshan period	112.856	22.9595	Yu Z. 2022	余翀，2022
118	Yunnan	Kunming	Tianzimiao	upper Yangtze River	Shizhaishan culture	Brongze Age	102.717	24.9726	Chen QJ et al. 2018	陈全家 等，2018
119	Sichuan	Chengdu	Shierqiao	upper Yangtze River	Shang–Zhou Dynasty	Brongze Age	104.051	30.6702	Li XC et al. 2005	李绪成 等，2005
120	Chongqing	Wushan	Lanjiazhai	upper Yangtze River	Spring and Autumn Period 2400	Brongze Age	109.806	31.2764	Wu XZ et al. 2014	武仙竹 等，2014
121	Chongqing	Wushan	Lanjiazhai	upper Yangtze River	Spring and Autumn Period 2400	Brongze Age	109.806	31.2764	Li ZT. 2013	李智涛，2013
122	Chongqing	Zhongxian	Wazhadi	upper Yangtze River	Eastern Zhou Dynasty	Brongze Age	108.05	30.3094	Li YH et al. 2014	李英华 等，2014
123	Chongqing	Wanxian	Maliutuo	upper Yangtze River	Eastern Zhou Dynasty	Brongze Age	108.277	30.5345	Li YH et al. 2014	李英华 等，2014
124	Chongqing	Youyang	Qingquan	upper Yangtze River	Shang–Zhou Dynasty	Brongze Age	108.397	28.8014	Chongqing Institute of Cultural Relics and Archaeology, 2009	重庆市文物考古所，2009
125	Hubei	Zigui	Dongmentou	middle Yangtze River	Shang Dynasty	Brongze Age	110.744	30.9633	Three Gorges Project Construction Committee Office of The State Council, 2010	国务院三峡工程建设委员会办公室，2010
126	Hubei	Zigui	Buzhuanghe	middle Yangtze River	Xia–Shang Dynasty	Brongze Age	110.752	30.9614	Wu XZ et al. 2008	武仙竹 等，2008
127	Hubei	Zigui	Liulinxi	middle Yangtze River	Xia–Shang Dynasty	Brongze Age	110.888	30.8966	Li YH et al. 2014	李英华 等，2014
128	Hubei	Zigui	Heguangzui	middle Yangtze River	Shang Dynasty	Brongze Age	110.744	30.9633	Three Gorges Project Construction Committee Office of The State Council, 2003	国务院三峡工程建设委员会办公室，2003
129	Hubei	Zigui	Shimenzui	middle Yangtze River	Shang–Zhou Dynasty	Brongze Age	110.569	31.0248	Cao WX. 2004	曹文宣，2004
130	Hubei	Zigui	Miaoping	middle Yangtze River	Western Zhou Dynasty	Brongze Age	110.907	30.7811	Li YH et al. 2014	李英华 等，2014
131	Hubei	Jingzhou	Jingnansi	middle Yangtze River	Xia–Shang Dynasty	Brongze Age	112.15	30.355	Jingzhou Museum. 2009	荆州博物馆，2009
132	Hubei	Yichang	Lujiahe	middle Yangtze River	Shang Dynasty	Brongze Age	111.65	31.4	Changjiang Water Resources Commission. 2002	长江水利委员会，2002
133	Hubei	Changyang	Xianglushan	middle Yangtze River	Shang–Zhou Dynasty	Brongze Age	110.646	30.9732	Li YH et al. 2014	李英华 等，2014
134	Hubei	Jingzhou	ZhouliangyuQiao	middle Yangtze River	Shang Dynasty	Brongze Age	112.287	30.3122	Peng JH.1988	彭锦华，1988
135	Hubei	Jingzhou	Tianxingguan	middle Yangtze River	2350–2330	Brongze Age	112.452	30.4116	Hunbei Jingzhou Museum, 2003	湖北省荆州博物馆，2003
136	Shanghai	Minhang	Maqiao	lower Yangtze River	3900–3200	Brongze Age	121.398	31.0401	Song J et al. 1997	宋建 等，1997
137	Jiangsu	Nanjing	Beiyinyangying	Huai River	Shang–Zhou Dynasty	Brongze Age	118.779	32.0659	Nanjing Museum. 1993	南京博物院，1993
138	Henan	Xinyang	Sunzhai	Huai River	Western Zhou Dynasty	Brongze Age	113.979	32.2705	Huang SB. 1989	黄士斌，1989
